# Supplementary material for: Photopatterning of conductive hydrogels which exhibit tissue-like properties
Source: Royal Society of Chemistry journal article supplement (doi:10.1039/d4tb00807c), 2024-01-01
Supplement: d4tb00807c1.pdf [file d4tb00807c1.pdf]

Photopatterning of conductive hydrogels which exhibit tissue-like properties

Léo Sifringer<sup>1</sup>, Lina De Windt<sup>1</sup>, Stéphane Bernhard<sup>2</sup>, Giulia Amos<sup>1</sup>, Blandine Clément<sup>1</sup>, Jens Duru<sup>1</sup>, Mark W. Tibbitt<sup>2</sup>, Christina M Tringides\*<sup>1</sup>

Affiliations:

1. Laboratory of Biosensors and Bioelectronics, Institute for Biomedical Engineering, ETH Zürich, Switzerland.
2. Macromolecular Engineering Laboratory, Department of Mechanical and Process Engineering, ETH Zürich, Zurich, Switzerland.

\*ctringides@ethz.ch

SUPPLEMENTAL INFORMATION

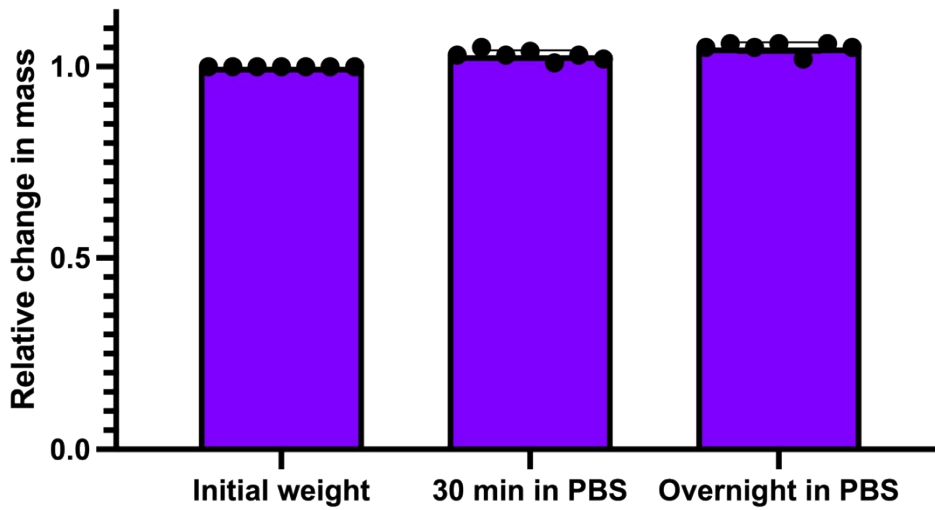

**Figure S1: Evaluation of conductive hydrogel stability in PBS.** Assessment of relative change in hydrogel mass, immediately after formation (“initial weight”), after soaking in PBS for 30 min, and after soaking in PBS overnight.

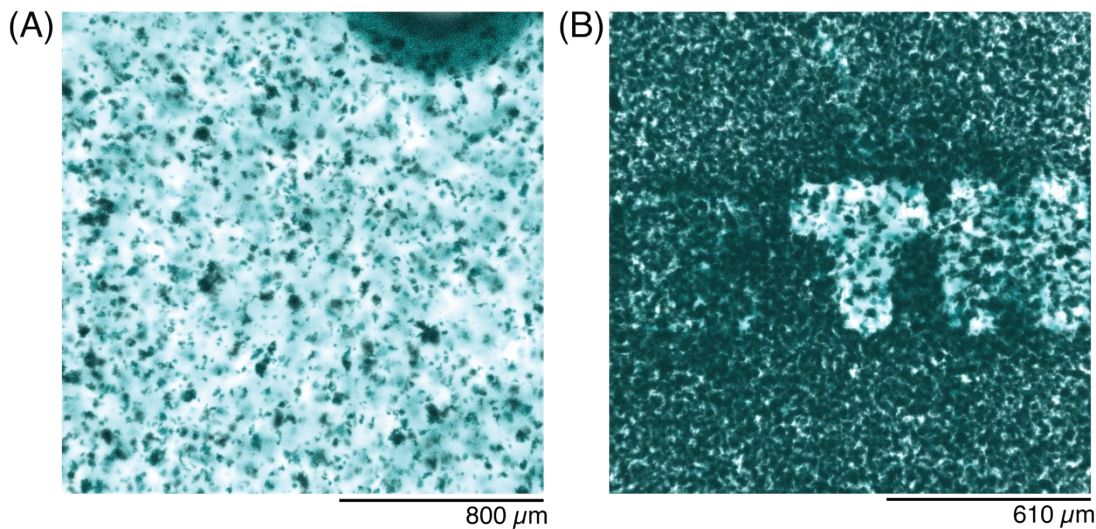

**S2: Photopatterning of the under the patterned light**  
Photomicrograph of the precursor, before exposed to composition, and (B) after ROI, the pattern(s) are

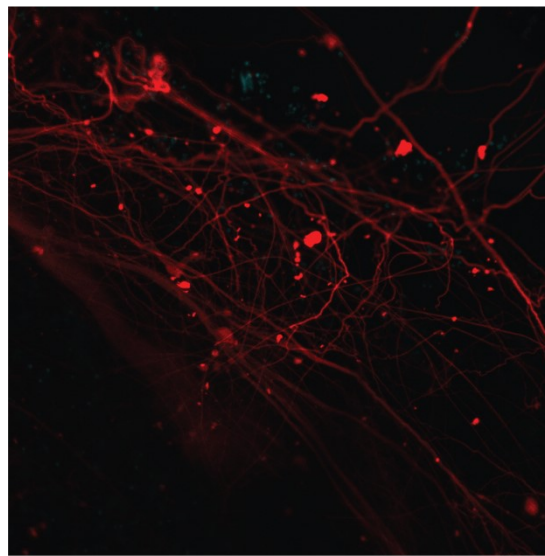

**Figure**  
**conductive hydrogel (405 nm).** (A) conductive hydrogel ROI, is uniform in exposure to a defined visible.

380 μm

**Figure S3: Evaluating the morphology of sensory neurons at DIV45 on bare GelMA hydrogels.** hDRG seeded on a bare (no graphene flakes added) 5% w/v GelMA hydrogel, imaged at 30x magnification. Red: SMI312 (axon marker), green: peripherin (DRG axon sub-type), cyan: Hoechst (nucleus).
